# Supplementary material for: Dysregulated Glutamate Transporter SLC1A1 Propels Cystine Uptake via Xc− for Glutathione Synthesis in Lung Cancer
Source: Oxford University Press journal article supplement (doi:10.1158/0008-5472.can-20-0617), 2020-11-23
Supplement: 00085472can200617-sup-238078_4_supp_6656251_qvdkyn.docx [file 00085472can200617-sup-238078_4_supp_6656251_qvdkyn.docx]

**Supplementary Information**

**Dysregulated Glutamate Transporter SLC1A1 Propels Cystine Uptake via Xc- for Glutathione Synthesis in Lung Cancer**

Wenzheng Guo1, 9 ‡, Kaimi Li1, 2,‡, Beibei Sun3, ‡, Dongliang Xu1,2, Lingfeng Tong2, Huijing Yin1, Yueling Liao1,2, Hongyong Song1,2, Tong Wang1,2, Bo Jing1,2, Min Hu1,2, Shuli Liu4, Yanbin Kuang5, Jing Ling6, Qi Li6, Yadi Wu8, Qi Wang5, Feng Yao7, Binhua P. Zhou8, ,Shu-Hai Lin10*, Jiong Deng1,2,3,*

**Supplementary Figure legends**

**Figure S1. Related to Figure 1**

**(A-I)** The metabolomics of different age mouse lung tissues showed a variety of intermediate metabolites associated with glutathione synthesis, including glutathione-oxidized (GSSG), S-methylglutathione, glycine, cysteine, cystine, cysteine-glutathione disulfide, glutamine, 5-oxoproline and ophthalmate. *** p<0.05. Error bars represent SEM. When not mentioned, differences are not significant.

**
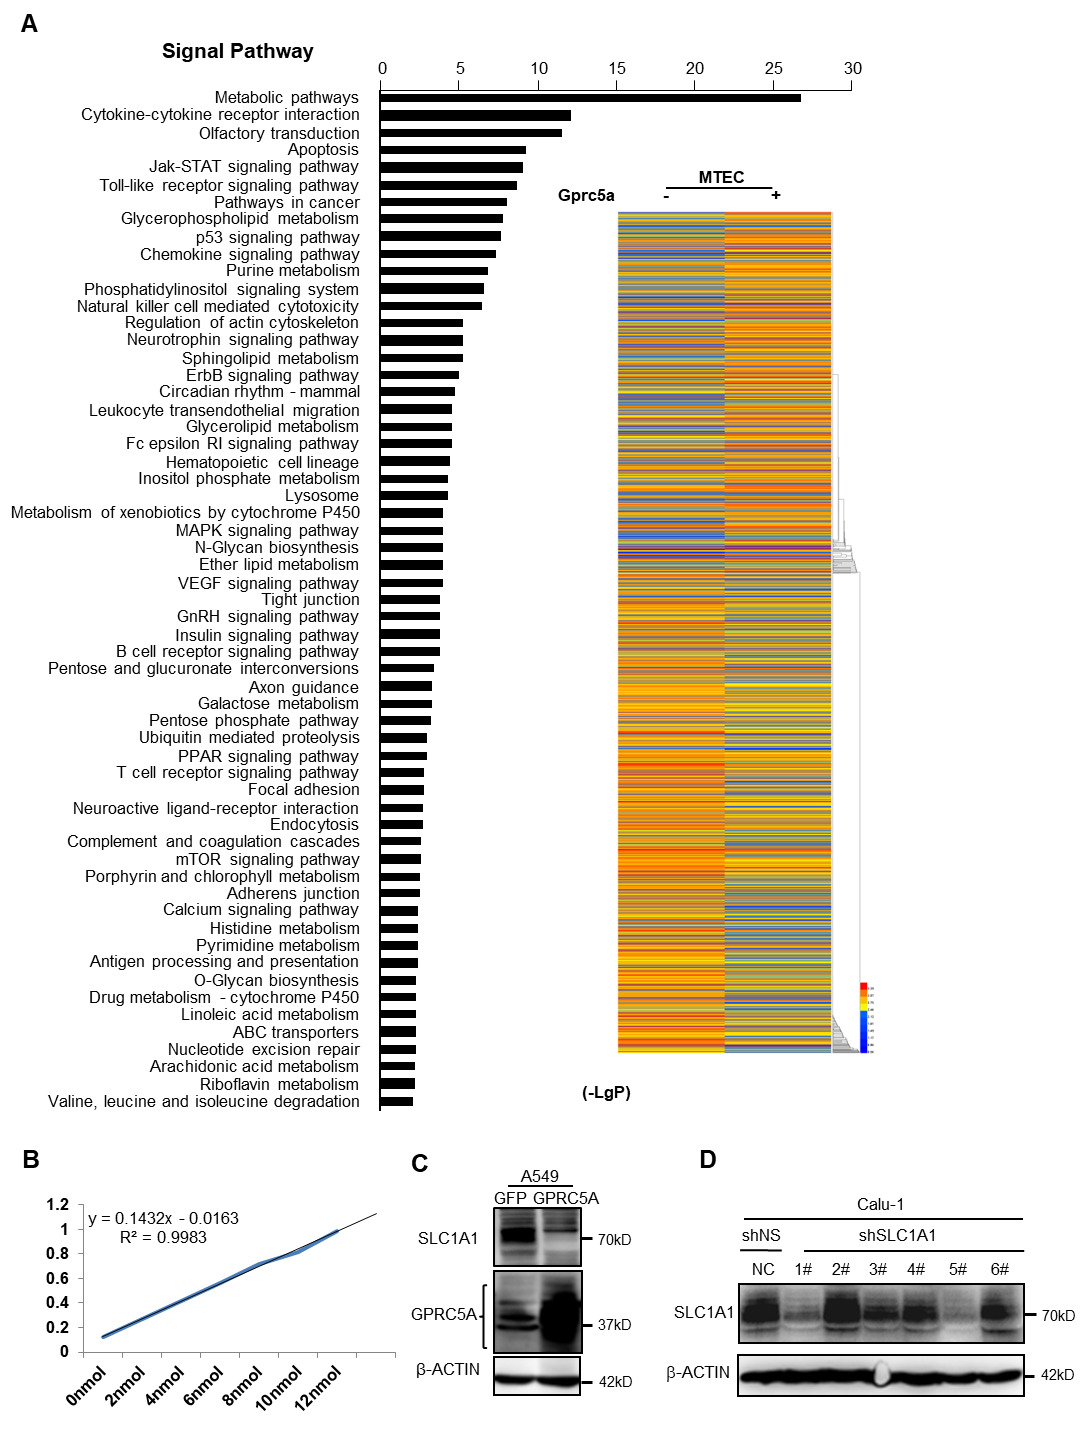
Figure S2. Related to Figure 2**

**(A)** mRNA array data of MTEC-KO verse MTEC-WT cell showed the significantly different signal pathways and genes. **(B)** The standard curve of glutamate was mapped using Glutamate Colorimetric Assay Kit. **(C)** Western blot analysis of SLC1A1 expression in A549-GFP and A549-GPRC5A stable transfectants. **(D)** Western blot show the efficient of SLC1A1 knockdown in Calu-1 cell.

**Figure S3. Related to Figure 2**

(**A**) FACS analysis of the Aldh1+, stem cell–enriched population, of SJT-1601 treating with BSO (50uM, 18h). (**B**) Representative images of A549-Control and A549-BSO clones formed by clonogenic analysis and soft agarose. (**C**) Annexin V indicates the apoptosis of A549 siNC/SLC1A1 in the growth medium (DMEM, glutamine deficient and glutamine deficient added with glutamate). (**D**) Annexin V show the apoptosis of Calu-1 siNC/SLC1A1 in the growth medium (DMEM, glutamine deficient and glutamine deficient added with glutamate). *** p<0.05. Error bars represent SEM. When not mentioned, differences are not significant. All experiments are representative of two performed.


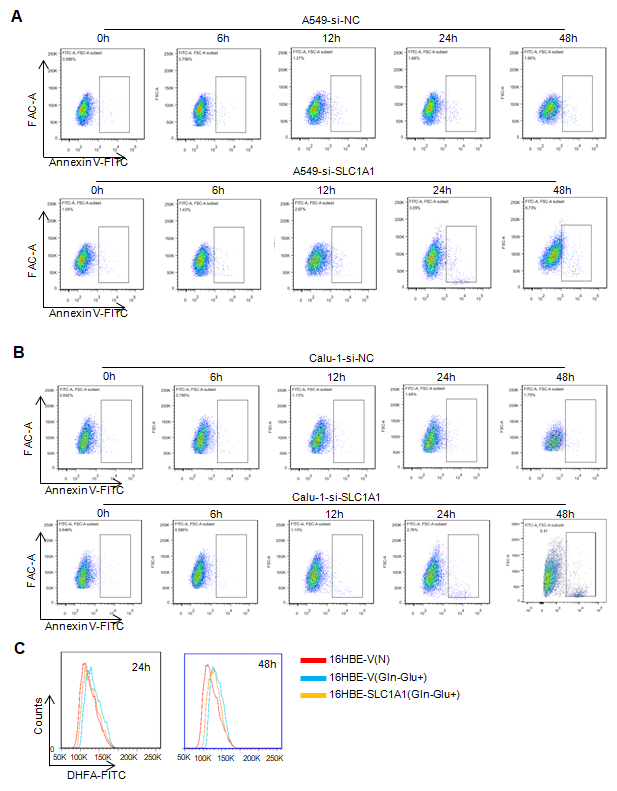


**Figure S4. Related to Figure 3**

**(A)** FACS analysis of the Aldh1+, stem cell–enriched population, of A549-siNC and A549-si-SLC1A1 cells in Gln-Glu+ medium. **(B)** FACS analysis of the Aldh1+, stem cell–enriched population, of Calu-1-siNC and Calu-1-si-SLC1A1 cells in Gln-Glu+ medium. **(C)** The level of ROS was detected in 16HBE-V and 16HBE-SLC1A1 cells in Gln-Glu+ medium.

**Figure S5. Related to Figure 4**

**(A-B)** Isotopomer spectral analysis of 13C-labeled GSSG (M5) and pyroglutamate (M5) using [U-13C5]-glutamine as the tracer *in vitro*. (**C-E**) Isotopomer spectral analysis of 13C-labled glutamate (M+5), GSH (M+5) and gamma-glutamylcysteine (M+5) using [U-13C6]-glucose as the tracer *in vitro*. **(F)** Isotopomer spectral analysis of 13C-labeled succinic acid in Calu1-shNC, and -shSLC1A1-5# cells using [U-13C5]-glutamate as the tracer *in vitro*. **(G)** Isotopomer spectral analysis of 13C-labeled GSSG (M+8) in Calu1-siNC and Calu1-siSLC1A1 using 13C6-15N2-cystine as the tracer in vitro. **(H)** The schema of tracing GSH synthesis pathway with [13C6-15N2] -cystine *in vivo*. *** p<0.05. Error bars represent SEM. When not mentioned, differences are not significant. All experiments are representative of two performed.

**Figure S6. Related to Figure 5**

**(A-B)** Isotopomer spectral analysis of 13C-labeled GSSG (M5) and glutamine (M5) *in vivo* using [U-13C5]-glutamine as the tracer. *** p<0.05. Error bars represent SEM. When not mentioned, differences are not significant. All experiments are representative of two performed. **C,** Different exposure FITC-fluoresence images of tumor subcutaneously bearing in nude mice (n=3 each group). Bottom: FITC-fluoresence. Top: White light. (A549-sh-NC cell: 1.5 x106, A549-sh-SLC1A1 cell: 3 x106). **D**, average of FITC-fluoresence in tumors derived from A549-shNC and A549-shSLC1A1 cells (n=3). *** p<0.05. Error bars represent SEM. When not mentioned, differences are not significant.

**Figure S7. Related to Figure 6**

**(A-B)** Relative mRNA expression of MGR8 (A) and MGR5 (B) in a set of human lung tumors compared with adjacent normal lung tissues. **(C-D)**The human lung tumor tissue chip from a THPA dataset show the expression of SLC1A1 and GPRC5A. **(E-F)** The percentage of high, medium and low expression of GPRC5A and SLC1A1 in this dataset. *** p<0.05. Error bars represent SEM. When not mentioned, differences are not significant. All experiments are representative of two performed.
